# Supplementary material for: BRCE: bi-roles co-evolution for energy-efficient distributed heterogeneous permutation flow shop scheduling with flexible machine speed
Source: Springer Nature journal article supplement (doi:10.1007/s40747-023-00984-x), 2023-02-15
Supplement: MOESM1 [file 24034132]

# Supplementary Files

Table S-I Statistical results of all metrics of all variant algorithms in all instances.

| Instance | HV     |        |               |        |               |        |               |        |               |        |
|----------|--------|--------|---------------|--------|---------------|--------|---------------|--------|---------------|--------|
|          | BRCE-C |        | BRCE          |        | BRCE+E        |        | BRCE+EV       |        | BRCE+EVH      |        |
| n_m_f    | mean   | std    | mean          | std    | mean          | std    | mean          | std    | mean          | std    |
| 20_5_2   | 0.6429 | 0.0084 | 0.6435        | 0.0110 | 0.6468        | 0.0076 | 0.6486        | 0.0066 | <b>0.7267</b> | 0.0067 |
| 20_10_2  | 0.5970 | 0.0118 | 0.5987        | 0.0074 | 0.5963        | 0.0082 | 0.5983        | 0.0084 | <b>0.6912</b> | 0.0050 |
| 20_20_2  | 0.5497 | 0.0094 | 0.5551        | 0.0064 | 0.5500        | 0.0077 | 0.5518        | 0.0068 | <b>0.6670</b> | 0.0020 |
| 50_5_2   | 0.5862 | 0.0079 | 0.5845        | 0.0057 | 0.6115        | 0.0070 | 0.6118        | 0.0123 | <b>0.7112</b> | 0.0030 |
| 50_10_2  | 0.5111 | 0.0057 | 0.5108        | 0.0077 | 0.5373        | 0.0076 | 0.5365        | 0.0082 | <b>0.6546</b> | 0.0051 |
| 50_20_2  | 0.4826 | 0.0061 | 0.4822        | 0.0077 | 0.4923        | 0.0077 | 0.4992        | 0.0058 | <b>0.6349</b> | 0.0029 |
| 100_5_2  | 0.5620 | 0.0059 | 0.5613        | 0.0080 | 0.5685        | 0.0076 | 0.5682        | 0.0059 | <b>0.6864</b> | 0.0055 |
| 100_10_2 | 0.5144 | 0.0044 | 0.5129        | 0.0038 | 0.5191        | 0.0086 | 0.5203        | 0.0082 | <b>0.6553</b> | 0.0039 |
| 100_20_2 | 0.4554 | 0.0059 | 0.4593        | 0.0112 | 0.4622        | 0.0065 | 0.4612        | 0.0058 | <b>0.6129</b> | 0.0050 |
| 200_10_2 | 0.4797 | 0.0072 | 0.4807        | 0.0079 | 0.4906        | 0.0060 | 0.4892        | 0.0049 | <b>0.6388</b> | 0.0022 |
| 200_20_2 | 0.4458 | 0.0042 | 0.4487        | 0.0065 | 0.4514        | 0.0056 | 0.4480        | 0.0064 | <b>0.6170</b> | 0.0032 |
| 20_5_3   | 0.6505 | 0.0104 | 0.6479        | 0.0095 | 0.6509        | 0.0119 | 0.6579        | 0.0105 | <b>0.7217</b> | 0.0062 |
| 20_10_3  | 0.6145 | 0.0134 | 0.6194        | 0.0111 | 0.6046        | 0.0119 | 0.6064        | 0.0125 | <b>0.6969</b> | 0.0059 |
| 20_20_3  | 0.5493 | 0.0079 | 0.5517        | 0.0136 | 0.5601        | 0.0063 | 0.5564        | 0.0086 | <b>0.6664</b> | 0.0049 |
| 50_5_3   | 0.6335 | 0.0096 | 0.6337        | 0.0064 | 0.6512        | 0.0095 | 0.6594        | 0.0095 | <b>0.7386</b> | 0.0042 |
| 50_10_3  | 0.5403 | 0.0088 | 0.5431        | 0.0067 | 0.5546        | 0.0077 | 0.5560        | 0.0067 | <b>0.6711</b> | 0.0038 |
| 50_20_3  | 0.4939 | 0.0048 | 0.4950        | 0.0072 | 0.5018        | 0.0083 | 0.5021        | 0.0113 | <b>0.6238</b> | 0.0028 |
| 100_5_3  | 0.5777 | 0.0099 | 0.5821        | 0.0111 | 0.5952        | 0.0070 | 0.5974        | 0.0096 | <b>0.6984</b> | 0.0074 |
| 100_10_3 | 0.5185 | 0.0099 | 0.5151        | 0.0081 | 0.5307        | 0.0100 | 0.5386        | 0.0095 | <b>0.6554</b> | 0.0043 |
| 100_20_3 | 0.4607 | 0.0092 | 0.4586        | 0.0080 | 0.4669        | 0.0080 | 0.4692        | 0.0064 | <b>0.6142</b> | 0.0040 |
| 200_10_3 | 0.4843 | 0.0077 | 0.4850        | 0.0090 | 0.5014        | 0.0081 | 0.5035        | 0.0035 | <b>0.6421</b> | 0.0060 |
| 200_20_3 | 0.4435 | 0.0062 | 0.4414        | 0.0091 | 0.4480        | 0.0071 | 0.4511        | 0.0077 | <b>0.6111</b> | 0.0022 |
| Instance | GD     |        |               |        |               |        |               |        |               |        |
|          | BRCE-C |        | BRCE          |        | BRCE+E        |        | BRCE+EV       |        | BRCE+EVH      |        |
| n_m_f    | mean   | std    | mean          | std    | mean          | std    | mean          | std    | mean          | std    |
| 20_5_2   | 0.0027 | 0.0008 | 0.0026        | 0.0008 | 0.0022        | 0.0007 | <b>0.0016</b> | 0.0003 | 0.0039        | 0.0005 |
| 20_10_2  | 0.0032 | 0.0019 | 0.0029        | 0.0008 | 0.0029        | 0.0011 | <b>0.0025</b> | 0.0008 | 0.0047        | 0.0006 |
| 20_20_2  | 0.0029 | 0.0016 | 0.0025        | 0.0014 | 0.0034        | 0.0018 | <b>0.0028</b> | 0.0009 | 0.0051        | 0.0005 |
| 50_5_2   | 0.0069 | 0.0015 | 0.0069        | 0.0009 | 0.0025        | 0.0008 | <b>0.0017</b> | 0.0007 | 0.0045        | 0.0005 |
| 50_10_2  | 0.0071 | 0.0021 | 0.0069        | 0.0018 | 0.0023        | 0.0011 | <b>0.0019</b> | 0.0012 | 0.0039        | 0.0004 |
| 50_20_2  | 0.0050 | 0.0014 | 0.0055        | 0.0015 | 0.0037        | 0.0018 | <b>0.0020</b> | 0.0009 | 0.0033        | 0.0004 |
| 100_5_2  | 0.0019 | 0.0008 | 0.0018        | 0.0009 | 0.0010        | 0.0005 | <b>0.0009</b> | 0.0003 | 0.0028        | 0.0004 |
| 100_10_2 | 0.0038 | 0.0016 | 0.0033        | 0.0011 | 0.0023        | 0.0012 | <b>0.0019</b> | 0.0008 | 0.0034        | 0.0005 |
| 100_20_2 | 0.0031 | 0.0011 | 0.0034        | 0.0027 | 0.0020        | 0.0014 | <b>0.0018</b> | 0.0017 | 0.0027        | 0.0003 |
| 200_10_2 | 0.0028 | 0.0012 | 0.0020        | 0.0008 | 0.0013        | 0.0010 | <b>0.0008</b> | 0.0004 | 0.0020        | 0.0002 |
| 200_20_2 | 0.0018 | 0.0013 | 0.0014        | 0.0013 | <b>0.0008</b> | 0.0006 | 0.0017        | 0.0014 | 0.0015        | 0.0001 |
| 20_5_3   | 0.0029 | 0.0012 | 0.0033        | 0.0012 | 0.0027        | 0.0017 | <b>0.0025</b> | 0.0009 | 0.0048        | 0.0006 |
| 20_10_3  | 0.0032 | 0.0019 | <b>0.0024</b> | 0.0017 | 0.0057        | 0.0011 | 0.0053        | 0.0011 | 0.0067        | 0.0007 |
| 20_20_3  | 0.0034 | 0.0011 | 0.0036        | 0.0014 | <b>0.0020</b> | 0.0008 | 0.0024        | 0.0011 | 0.0049        | 0.0007 |
| 50_5_3   | 0.0061 | 0.0016 | 0.0051        | 0.0012 | 0.0029        | 0.0018 | <b>0.0026</b> | 0.0011 | 0.0060        | 0.0008 |
| 50_10_3  | 0.0061 | 0.0027 | 0.0049        | 0.0019 | 0.0028        | 0.0017 | <b>0.0028</b> | 0.0015 | 0.0043        | 0.0007 |
| 50_20_3  | 0.0060 | 0.0009 | 0.0063        | 0.0018 | <b>0.0044</b> | 0.0014 | 0.0044        | 0.0019 | 0.0048        | 0.0005 |
| 100_5_3  | 0.0037 | 0.0007 | 0.0032        | 0.0012 | <b>0.0013</b> | 0.0005 | 0.0014        | 0.0010 | 0.0039        | 0.0003 |
| 100_10_3 | 0.0046 | 0.0015 | 0.0051        | 0.0014 | 0.0025        | 0.0015 | <b>0.0021</b> | 0.0012 | 0.0035        | 0.0003 |
| 100_20_3 | 0.0046 | 0.0027 | 0.0049        | 0.0014 | 0.0029        | 0.0023 | <b>0.0023</b> | 0.0009 | 0.0029        | 0.0003 |
| 200_10_3 | 0.0044 | 0.0010 | 0.0045        | 0.0014 | 0.0018        | 0.0015 | <b>0.0015</b> | 0.0009 | 0.0026        | 0.0003 |
| 200_20_3 | 0.0031 | 0.0020 | 0.0033        | 0.0017 | 0.0024        | 0.0016 | <b>0.0015</b> | 0.0015 | 0.0021        | 0.0003 |
| Instance | Spread |        |               |        |               |        |               |        |               |        |
|          | BRCE-C |        | BRCE          |        | BRCE+E        |        | BRCE+EV       |        | BRCE+EVH      |        |
| n_m_f    | mean   | std    | mean          | std    | mean          | std    | mean          | std    | mean          | std    |
| 20_5_2   | 0.8890 | 0.0371 | 0.9026        | 0.0350 | 0.8934        | 0.0279 | 0.9111        | 0.0166 | <b>0.7522</b> | 0.0742 |
| 20_10_2  | 0.9437 | 0.0232 | 0.9314        | 0.0145 | 0.9352        | 0.0220 | 0.9453        | 0.0177 | <b>0.8149</b> | 0.0560 |
| 20_20_2  | 0.9616 | 0.0183 | 0.9511        | 0.0168 | 0.9610        | 0.0204 | 0.9627        | 0.0143 | <b>0.8352</b> | 0.0695 |
| 50_5_2   | 0.9602 | 0.0335 | 0.9287        | 0.0103 | 0.9473        | 0.0203 | 0.9768        | 0.0282 | <b>0.8805</b> | 0.0329 |
| 50_10_2  | 0.9636 | 0.0140 | 0.9511        | 0.0133 | 0.9537        | 0.0141 | 0.9836        | 0.0084 | <b>0.8802</b> | 0.0497 |
| 50_20_2  | 0.9705 | 0.0110 | 0.9723        | 0.0139 | 0.9750        | 0.0170 | 0.9868        | 0.0062 | <b>0.9338</b> | 0.0835 |
| 100_5_2  | 0.9611 | 0.0096 | 0.9601        | 0.0114 | 0.9585        | 0.0111 | 0.9781        | 0.0057 | <b>0.8882</b> | 0.0449 |
| 100_10_2 | 0.9759 | 0.0145 | 0.9786        | 0.0083 | 0.9730        | 0.0130 | 0.9890        | 0.0038 | <b>0.9051</b> | 0.0667 |
| 100_20_2 | 0.9890 | 0.0047 | 0.9869        | 0.0075 | 0.9899        | 0.0078 | 0.9937        | 0.0013 | <b>0.9155</b> | 0.0541 |
| 200_10_2 | 0.9905 | 0.0093 | 0.9916        | 0.0048 | 0.9874        | 0.0029 | 0.9928        | 0.0038 | <b>0.8934</b> | 0.0333 |
| 200_20_2 | 0.9950 | 0.0034 | 0.9966        | 0.0037 | 0.9950        | 0.0028 | 0.9975        | 0.0026 | <b>0.9201</b> | 0.0597 |
| 20_5_3   | 0.9225 | 0.0292 | 0.9350        | 0.0380 | 0.9208        | 0.0223 | 0.9388        | 0.0281 | <b>0.7998</b> | 0.0492 |
| 20_10_3  | 0.9397 | 0.0175 | 0.9515        | 0.0138 | 0.9328        | 0.0308 | 0.9551        | 0.0191 | <b>0.8474</b> | 0.0730 |
| 20_20_3  | 0.9588 | 0.0116 | 0.9583        | 0.0221 | 0.9587        | 0.0143 | 0.9690        | 0.0132 | <b>0.8418</b> | 0.0469 |
| 50_5_3   | 0.9367 | 0.0309 | 0.9545        | 0.0371 | 0.9514        | 0.0216 | 0.9747        | 0.0193 | <b>0.9034</b> | 0.0448 |
| 50_10_3  | 0.9679 | 0.0295 | 0.9573        | 0.0216 | 0.9624        | 0.0183 | 0.9869        | 0.0116 | <b>0.9007</b> | 0.0571 |
| 50_20_3  | 0.9840 | 0.0156 | 0.9765        | 0.0117 | 0.9842        | 0.0145 | 0.9791        | 0.0079 | <b>0.8896</b> | 0.0279 |
| 100_5_3  | 0.9771 | 0.0448 | 0.9706        | 0.0213 | 0.9676        | 0.0126 | 0.9841        | 0.0158 | <b>0.8712</b> | 0.0291 |
| 100_10_3 | 0.9864 | 0.0180 | 0.9912        | 0.0171 | 0.9814        | 0.0108 | 0.9891        | 0.0075 | <b>0.9266</b> | 0.0522 |
| 100_20_3 | 0.9952 | 0.0171 | 0.9957        | 0.0281 | 0.9915        | 0.0072 | 0.9995        | 0.0141 | <b>0.9060</b> | 0.0529 |
| 200_10_3 | 0.9959 | 0.0115 | 0.9898        | 0.0077 | 0.9921        | 0.0103 | 0.9994        | 0.0087 | <b>0.9495</b> | 0.0613 |
| 200_20_3 | 1.0021 | 0.0086 | 0.9984        | 0.0049 | 0.9968        | 0.0037 | 0.9984        | 0.0032 | <b>0.9208</b> | 0.0491 |

Table S-II Statistical results of all metrics of all comparison algorithms in all instances.

| Instance | HV             |        |          |        |          |        |          |        |               |        |
|----------|----------------|--------|----------|--------|----------|--------|----------|--------|---------------|--------|
|          | NSGA-II        |        | MOEA/D   |        | PMMA     |        | KCA      |        | BRCE          |        |
| n.m.f    | mean           | std    | mean     | std    | mean     | std    | mean     | std    | mean          | std    |
| 20_5_2   | 0.6619-        | 0.0086 | 0.5656-  | 0.0127 | 0.5214-  | 0.0108 | 0.5965-  | 0.0146 | <b>0.7480</b> | 0.0063 |
| 20_10_2  | 0.6203-        | 0.0110 | 0.5372-  | 0.0135 | 0.4827-  | 0.0150 | 0.5796-  | 0.0150 | <b>0.7201</b> | 0.0046 |
| 20_20_2  | 0.553-         | 0.0094 | 0.4581-  | 0.0097 | 0.4427-  | 0.0094 | 0.5214-  | 0.0145 | <b>0.6710</b> | 0.0021 |
| 50_5_2   | 0.5862-        | 0.0079 | 0.5437-  | 0.0113 | 0.5118-  | 0.0126 | 0.5193-  | 0.0137 | <b>0.7112</b> | 0.0030 |
| 50_10_2  | 0.5274-        | 0.0057 | 0.4837-  | 0.0068 | 0.4699-  | 0.0053 | 0.5292-  | 0.0097 | <b>0.6744</b> | 0.0049 |
| 50_20_2  | 0.4836-        | 0.0061 | 0.4193-  | 0.0048 | 0.4317-  | 0.0050 | 0.5173-  | 0.0068 | <b>0.6362</b> | 0.0029 |
| 100_5_2  | 0.5748-        | 0.0058 | 0.5379-  | 0.0071 | 0.4912-  | 0.0039 | 0.5024-  | 0.0075 | <b>0.7016</b> | 0.0053 |
| 100_10_2 | 0.5347-        | 0.0040 | 0.4942-  | 0.0067 | 0.468-   | 0.0047 | 0.5119-  | 0.0050 | <b>0.6806</b> | 0.0036 |
| 100_20_2 | 0.4775-        | 0.0057 | 0.4305-  | 0.0058 | 0.4283-  | 0.0045 | 0.5026-  | 0.0049 | <b>0.6416</b> | 0.0048 |
| 200_10_2 | 0.4894-        | 0.0070 | 0.4798-  | 0.0038 | 0.4415-  | 0.0034 | 0.4806-  | 0.0036 | <b>0.6514</b> | 0.0021 |
| 200_20_2 | 0.4629-        | 0.0042 | 0.4339-  | 0.0043 | 0.4242-  | 0.0030 | 0.4932-  | 0.0053 | <b>0.6397</b> | 0.0030 |
| 20_5_3   | 0.7083-        | 0.0098 | 0.6222-  | 0.0221 | 0.5638-  | 0.0150 | 0.5957-  | 0.0307 | <b>0.7874</b> | 0.0060 |
| 20_10_3  | 0.6354-        | 0.0120 | 0.5431-  | 0.0154 | 0.5075-  | 0.0102 | 0.5138-  | 0.0140 | <b>0.7202</b> | 0.0058 |
| 20_20_3  | 0.5759-        | 0.0077 | 0.4923-  | 0.0094 | 0.4734-  | 0.0116 | 0.5478-  | 0.0183 | <b>0.6997</b> | 0.0045 |
| 50_5_3   | 0.6335-        | 0.0096 | 0.5658-  | 0.0145 | 0.552-   | 0.0127 | 0.5405-  | 0.0129 | <b>0.7386</b> | 0.0042 |
| 50_10_3  | 0.5589-        | 0.0082 | 0.5082-  | 0.0087 | 0.4979-  | 0.0083 | 0.5324-  | 0.0114 | <b>0.6931</b> | 0.0035 |
| 50_20_3  | 0.514-         | 0.0045 | 0.442-   | 0.0101 | 0.4531-  | 0.0081 | 0.4593-  | 0.0084 | <b>0.6494</b> | 0.0027 |
| 100_5_3  | 0.585-         | 0.0102 | 0.5536-  | 0.0115 | 0.5233-  | 0.0089 | 0.4993-  | 0.0097 | <b>0.7082</b> | 0.0072 |
| 100_10_3 | 0.5269-        | 0.0096 | 0.4903-  | 0.0085 | 0.4791-  | 0.0052 | 0.505-   | 0.0055 | <b>0.6653</b> | 0.0041 |
| 100_20_3 | 0.4837-        | 0.0091 | 0.4352-  | 0.0078 | 0.4376-  | 0.0032 | 0.5155-  | 0.0057 | <b>0.6442</b> | 0.0037 |
| 200_10_3 | 0.5028-        | 0.0075 | 0.5039-  | 0.0055 | 0.4641-  | 0.0061 | 0.4962-  | 0.0053 | <b>0.6655</b> | 0.0056 |
| 200_20_3 | 0.4585-        | 0.0061 | 0.4354-  | 0.0062 | 0.4192-  | 0.0034 | 0.4945-  | 0.0039 | <b>0.6305</b> | 0.0021 |
| -/=/+    | 22/0/0         |        | 22/0/0   |        | 22/0/0   |        | 22/0/0   |        |               |        |
| Instance | GD             |        |          |        |          |        |          |        |               |        |
|          | NSGA-II        |        | MOEA/D   |        | PMMA     |        | KCA      |        | BRCE          |        |
| n.m.f    | mean           | std    | mean     | std    | mean     | std    | mean     | std    | mean          | std    |
| 20_5_2   | <b>0.0025+</b> | 0.0008 | 0.0101-  | 0.0035 | 0.0227-  | 0.0045 | 0.0066-  | 0.0009 | 0.0037        | 0.0005 |
| 20_10_2  | <b>0.003+</b>  | 0.0018 | 0.0137-  | 0.0015 | 0.0252-  | 0.0063 | 0.0066-  | 0.0013 | 0.0047        | 0.0006 |
| 20_20_2  | <b>0.0027+</b> | 0.0014 | 0.0227-  | 0.0033 | 0.0258-  | 0.0039 | 0.008-   | 0.0018 | 0.0051        | 0.0005 |
| 50_5_2   | 0.0069-        | 0.0015 | 0.0111-  | 0.0025 | 0.0152-  | 0.0026 | 0.0108-  | 0.0027 | <b>0.0047</b> | 0.0005 |
| 50_10_2  | 0.007-         | 0.0022 | 0.0135-  | 0.0028 | 0.0109-  | 0.0022 | 0.0054-  | 0.0011 | <b>0.0040</b> | 0.0003 |
| 50_20_2  | 0.005-         | 0.0014 | 0.0193-  | 0.0027 | 0.0103-  | 0.0020 | 0.004=-  | 0.0009 | <b>0.0033</b> | 0.0004 |
| 100_5_2  | <b>0.0019+</b> | 0.0008 | 0.0065-  | 0.0010 | 0.0093-  | 0.0016 | 0.0059-  | 0.0011 | 0.0029        | 0.0004 |
| 100_10_2 | 0.0035=-       | 0.0014 | 0.008-   | 0.0017 | 0.0089-  | 0.0022 | 0.0057-  | 0.0012 | <b>0.0031</b> | 0.0005 |
| 100_20_2 | 0.0029=-       | 0.0010 | 0.0189-  | 0.0022 | 0.0054-  | 0.0015 | 0.0034-  | 0.0009 | <b>0.0025</b> | 0.0003 |
| 200_10_2 | 0.0027=-       | 0.0011 | 0.0046-  | 0.0012 | 0.0037-  | 0.0013 | 0.003-   | 0.0006 | <b>0.0020</b> | 0.0002 |
| 200_20_2 | 0.0018=-       | 0.0011 | 0.0092-  | 0.0015 | 0.0029-  | 0.0013 | 0.0027-  | 0.0009 | <b>0.0015</b> | 0.0001 |
| 20_5_3   | <b>0.0025+</b> | 0.0011 | 0.0136-  | 0.0021 | 0.0239-  | 0.0031 | 0.0099-  | 0.0019 | 0.0042        | 0.0005 |
| 20_10_3  | <b>0.0022+</b> | 0.0019 | 0.0152-  | 0.0027 | 0.0262-  | 0.0052 | 0.0131-  | 0.0026 | 0.0064        | 0.0007 |
| 20_20_3  | <b>0.0032+</b> | 0.0011 | 0.0196-  | 0.0032 | 0.0219-  | 0.0038 | 0.0086-  | 0.0018 | 0.0046        | 0.0007 |
| 50_5_3   | 0.0061=-       | 0.0016 | 0.0128-  | 0.0053 | 0.0159-  | 0.0058 | 0.0101-  | 0.0024 | <b>0.0058</b> | 0.0006 |
| 50_10_3  | 0.0059=-       | 0.0026 | 0.0142-  | 0.0025 | 0.007-   | 0.0019 | 0.0059-  | 0.0021 | <b>0.0043</b> | 0.0006 |
| 50_20_3  | 0.0061=-       | 0.0010 | 0.0277-  | 0.0057 | 0.0094-  | 0.0036 | 0.0123-  | 0.0035 | <b>0.0049</b> | 0.0006 |
| 100_5_3  | <b>0.0037+</b> | 0.0007 | 0.0093-  | 0.0024 | 0.0071-  | 0.0022 | 0.0084-  | 0.0011 | 0.0041        | 0.0003 |
| 100_10_3 | 0.0045=-       | 0.0015 | 0.01-    | 0.0029 | 0.0058-  | 0.0025 | 0.0058-  | 0.0015 | <b>0.0035</b> | 0.0003 |
| 100_20_3 | 0.0044=-       | 0.0026 | 0.0204-  | 0.0029 | 0.0058-  | 0.0018 | 0.004-   | 0.0010 | <b>0.0029</b> | 0.0003 |
| 200_10_3 | 0.0042-        | 0.0009 | 0.0053-  | 0.0013 | 0.0049-  | 0.0012 | 0.0035-  | 0.0008 | <b>0.0027</b> | 0.0003 |
| 200_20_3 | 0.0031=-       | 0.0020 | 0.0108-  | 0.0022 | 0.0041-  | 0.0013 | 0.0022=- | 0.0008 | <b>0.0020</b> | 0.0002 |
| -/=/+    | 5/9/8          |        | 22/0/0   |        | 22/0/0   |        | 20/2/0   |        |               |        |
| Instance | Spread         |        |          |        |          |        |          |        |               |        |
|          | NSGA-II        |        | MOEA/D   |        | PMMA     |        | KCA      |        | BRCE          |        |
| n.m.f    | mean           | std    | mean     | std    | mean     | std    | mean     | std    | mean          | std    |
| 20_5_2   | 0.8889-        | 0.0371 | 0.9561-  | 0.0840 | 0.9838-  | 0.0241 | 0.9297-  | 0.0217 | <b>0.7489</b> | 0.0740 |
| 20_10_2  | 0.9448-        | 0.0237 | 0.9443-  | 0.0469 | 0.9976-  | 0.0323 | 0.9742-  | 0.0443 | <b>0.8137</b> | 0.0567 |
| 20_20_2  | 0.961-         | 0.0185 | 0.9635-  | 0.0122 | 0.9865-  | 0.0128 | 1.0069-  | 0.0122 | <b>0.8364</b> | 0.0677 |
| 50_5_2   | 0.9597-        | 0.0339 | 0.9723-  | 0.0332 | 0.9927-  | 0.0044 | 0.984-   | 0.0174 | <b>0.8800</b> | 0.0331 |
| 50_10_2  | 0.9633-        | 0.0144 | 0.978-   | 0.0201 | 0.9934-  | 0.0076 | 0.9909-  | 0.0193 | <b>0.8813</b> | 0.0498 |
| 50_20_2  | 0.9705=-       | 0.0109 | 0.989=-  | 0.0153 | 0.9951=- | 0.0102 | 1.0036-  | 0.0152 | <b>0.9338</b> | 0.0834 |
| 100_5_2  | 0.9585-        | 0.0103 | 0.9732-  | 0.0268 | 0.9853-  | 0.0130 | 0.9871-  | 0.0058 | <b>0.8791</b> | 0.0476 |
| 100_10_2 | 0.9754-        | 0.0151 | 0.9831-  | 0.0292 | 0.9896-  | 0.0099 | 0.9925-  | 0.0104 | <b>0.9071</b> | 0.0660 |
| 100_20_2 | 0.989-         | 0.0047 | 0.9942-  | 0.0079 | 0.9926-  | 0.0087 | 1.0117-  | 0.0140 | <b>0.9166</b> | 0.0540 |
| 200_10_2 | 0.9906-        | 0.0093 | 0.9771-  | 0.0091 | 0.9954-  | 0.0054 | 0.9961-  | 0.0039 | <b>0.8927</b> | 0.0335 |
| 200_20_2 | 0.995-         | 0.0034 | 0.9921-  | 0.0046 | 0.9935-  | 0.0043 | 1-       | 0.0038 | <b>0.9201</b> | 0.0597 |
| 20_5_3   | 0.9223-        | 0.0299 | 0.9546-  | 0.0688 | 0.9767-  | 0.0235 | 0.9215-  | 0.0365 | <b>0.7946</b> | 0.0488 |
| 20_10_3  | 0.9475-        | 0.0152 | 0.9589-  | 0.0565 | 0.9956-  | 0.0245 | 0.9894-  | 0.0253 | <b>0.8689</b> | 0.0647 |
| 20_20_3  | 0.9579-        | 0.0117 | 0.9764-  | 0.0274 | 0.9934-  | 0.0091 | 1.0286-  | 0.0190 | <b>0.8427</b> | 0.0484 |
| 50_5_3   | 0.9437=-       | 0.0272 | 0.9761-  | 0.0495 | 1.0019-  | 0.0278 | 0.9802-  | 0.0257 | <b>0.9054</b> | 0.0439 |
| 50_10_3  | 0.9662-        | 0.0318 | 0.9765-  | 0.0197 | 0.9912-  | 0.0155 | 0.9945-  | 0.0275 | <b>0.9016</b> | 0.0580 |
| 50_20_3  | 0.9849-        | 0.0153 | 0.9966-  | 0.0157 | 0.9914-  | 0.0071 | 1.0021-  | 0.0130 | <b>0.9049</b> | 0.0254 |
| 100_5_3  | 0.976-         | 0.0456 | 0.9635-  | 0.0321 | 0.9927-  | 0.0117 | 0.9872-  | 0.0096 | <b>0.8698</b> | 0.0287 |
| 100_10_3 | 0.9865-        | 0.0181 | 0.9598-  | 0.0179 | 0.9933-  | 0.0063 | 0.9977-  | 0.0140 | <b>0.9276</b> | 0.0530 |
| 100_20_3 | 0.9953-        | 0.0174 | 0.9933-  | 0.0069 | 0.992-   | 0.0058 | 1.0081-  | 0.0220 | <b>0.9064</b> | 0.0536 |
| 200_10_3 | 0.996-         | 0.0116 | 0.9808=- | 0.0138 | 0.9939=- | 0.0053 | 0.9965=- | 0.0034 | <b>0.9495</b> | 0.0616 |
| 200_20_3 | 1.002-         | 0.0084 | 0.9973-  | 0.0109 | 0.9891-  | 0.0080 | 1.0002-  | 0.0047 | <b>0.9205</b> | 0.0495 |
| -/=/+    | 20/2/0         |        | 20/2/0   |        | 20/2/0   |        | 21/1/0   |        |               |        |
